# Supplementary material for: Efficient hydrogen generation from formic acid using AgPd nanoparticles immobilized on carbon nitride-functionalized SBA-15
Source: Royal Society of Chemistry journal article supplement (doi:10.1039/c6ra06071d), 2016-01-01
Supplement: c6ra06071d1.pdf [file c6ra06071d1.pdf]

## Supporting Information

### **Efficient hydrogen generation from formic acid using AgPd nanoparticles immobilized on carbon nitride-functionalized SBA-15**

Lixin Xu<sup>a</sup>, Bo Jin<sup>a</sup>, Jian Zhang<sup>a</sup>, Dang-guo Cheng<sup>b</sup>, Fengqiu Chen<sup>b</sup>, Yue An<sup>b</sup>, Ping Cui<sup>a</sup> and Chao Wan<sup>a,\*</sup>

*<sup>a</sup> College of Chemistry and Chemical Engineering, Anhui University of Technology, 59 Hudong Road, Ma'anshan 243002, China*

*<sup>b</sup> College of Chemical and Biological Engineering, Zhejiang University, 38 Zheda Road, Hangzhou 310027, China*

---

\* Corresponding author. Tel.: +86 555 2311807; Fax: +86 555 2311822.

E-mail address: wanchao1219@hotmail.com (Chao Wan)

Calculation methods:

$$\square x_a = \frac{P_{atm} V_{H2} / RT}{n_{FA}} \quad (S1)$$

Where  $x_a$  is conversion,  $P_{atm}$  is the atmospheric pressure (101325 Pa),  $V_{H2}$  is the generated volume of  $H_2$ ,  $R$  is the universal gas constant ( $8.3145 \text{ m}^3 \cdot \text{Pa} \cdot \text{mol}^{-1} \cdot \text{K}^{-1}$ ),  $T$  is room temperature (278 K), and  $n_{FA}$  is the mole number of FA.

□

$$\square TOF_{initial} = \frac{P_{atm} V_{H2} / RT}{n_{Ag+Pd} t} \quad (S2)$$

Where  $TOF_{initial}$  is initial turnover frequency when  $x_a$  reaches 20%,  $n_{Ag+Pd}$  is the mole number of the Ag and Pd, and  $t$  is the reaction time when  $x_a$  reaches 20%.

□

(S1) Y. Yuan, Z. Zhao, J. Zheng, M. Yang, L. Qiu, Z. Li and Z. Zou, *J. Mater. Chem.*, 2010, 20, 6772.

(S2) P. Chen, T. Y. Xiao, H. H. Li, J. J. Yang, Z. Wang, H. B. Yao and S. H. Yu, *ACS Nano.*, 2012, 6, 712.

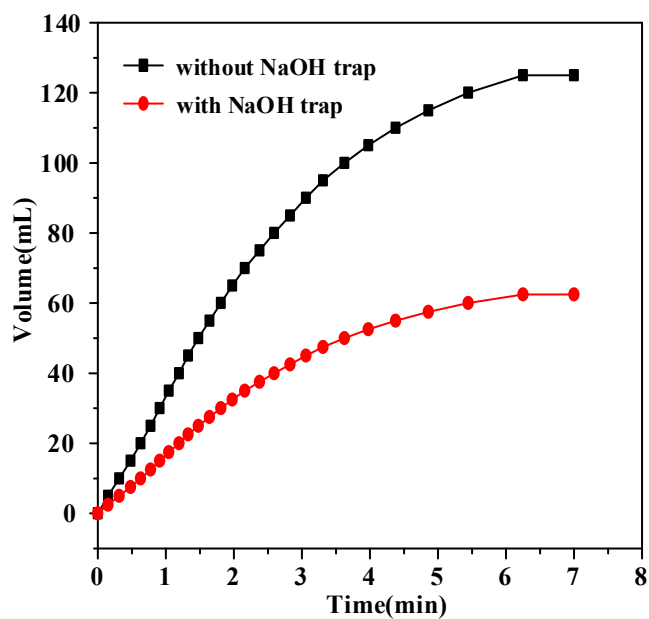

**Fig. S1.** Gas generation by decomposition of FA/SF vs time catalyzed by  $\text{Ag}_{10}\text{Pd}_{90}/0.2\text{CND}/\text{SBA}-15$  at 323 K with and without NaOH trap (catalyst= 100 mg,  $n_{\text{FA}}=3$  mmol,  $n_{\text{SF}}=1$  mmol).

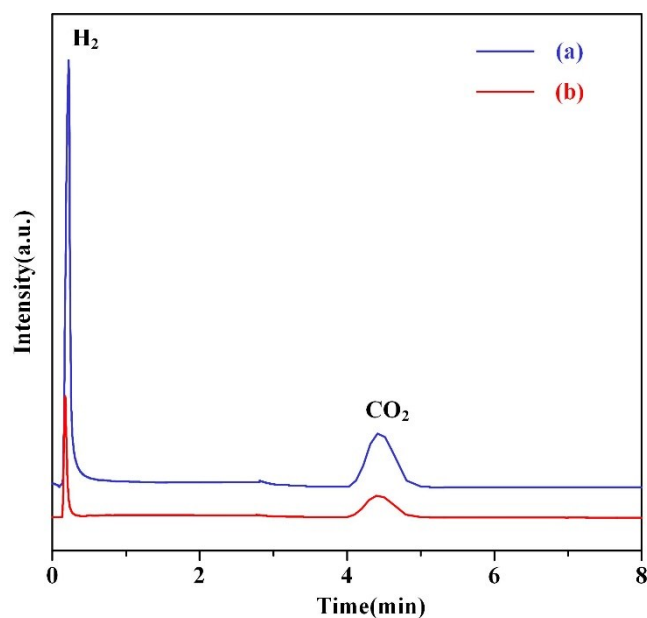

**Fig. S2.** GC spectrum using TCD for a) commercial mixture gas of  $\text{H}_2$  and  $\text{CO}_2$ , and b) evolved gas from FA/FS aqueous solution ( $n_{\text{FA}}=3$  mmol,  $n_{\text{SF}}=1$  mmol) over  $\text{Ag}_{10}\text{Pd}_{90}/0.2\text{CND}/\text{SBA}-15$  at 323 K.

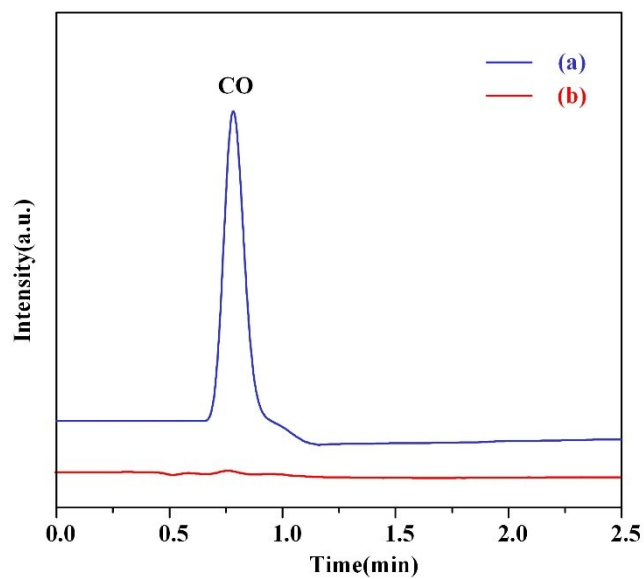

**Fig. S3.** GC spectrum using FID-Methanator for the a) commercial pure CO, and b) evolved gas from FA/SF aqueous solution ( $n_{\text{FA}} = 3$  mmol,  $n_{\text{SF}} = 1$  mmol) over  $\text{Ag}_{10}\text{Pd}_{90}/0.2\text{CND}/\text{SBA-15}$  at 323 K.

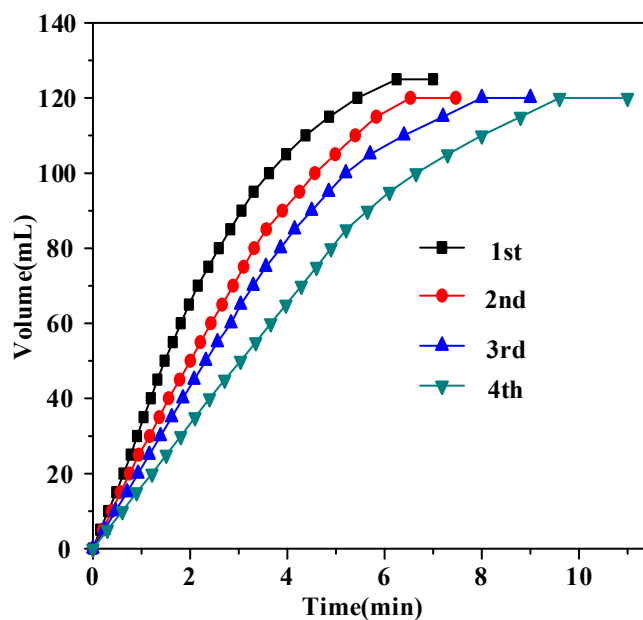

**Fig. S4.** Stability test on the  $\text{Ag}_{10}\text{Pd}_{90}/0.2\text{CND}/\text{SBA-15}$  catalyst in the dehydrogenation of FA/SF at 323 K (catalyst= 100 mg,  $n_{\text{FA}} = 3$  mmol,  $n_{\text{SF}} = 1$  mmol).

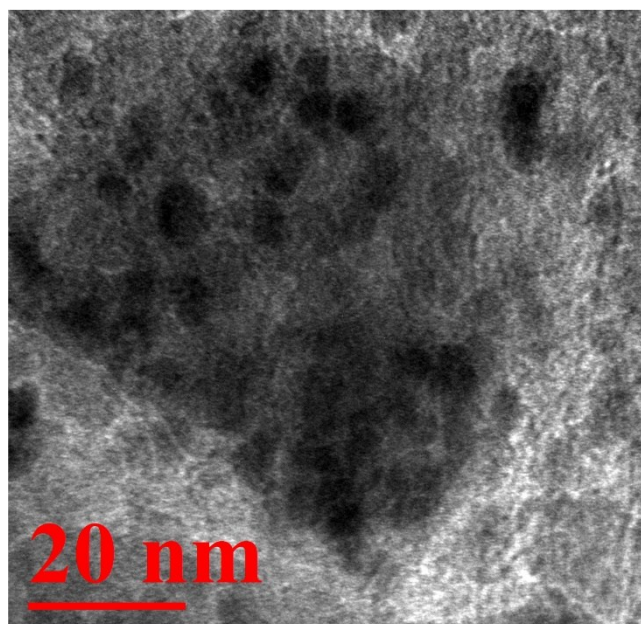

Fig. S5 TEM image of  $\text{Ag}_{10}\text{Pd}_{90}/0.2\text{CND}/\text{SBA-15}$  after four runs

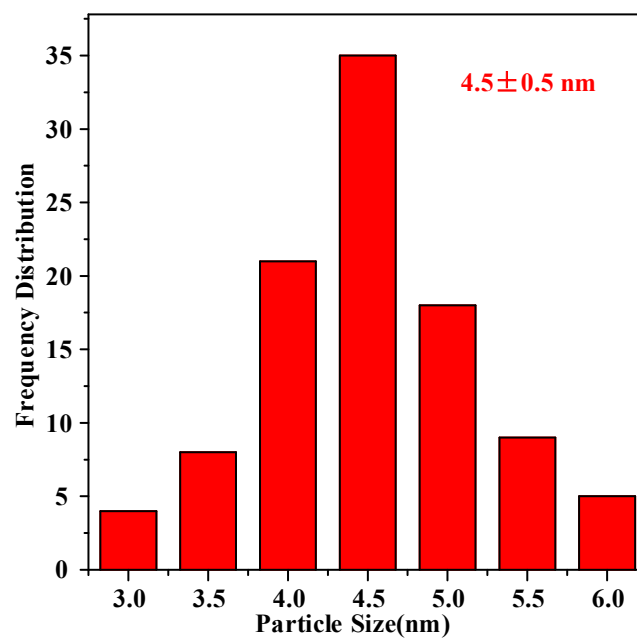

Fig. S6.  $\text{Ag}_{10}\text{Pd}_{90}$  nanoparticle size distribution of  $\text{Ag}_{10}\text{Pd}_{90}/0.2\text{CND}/\text{SBA-15}$ , Mean size =  $4.5 \pm 0.5$  nm.

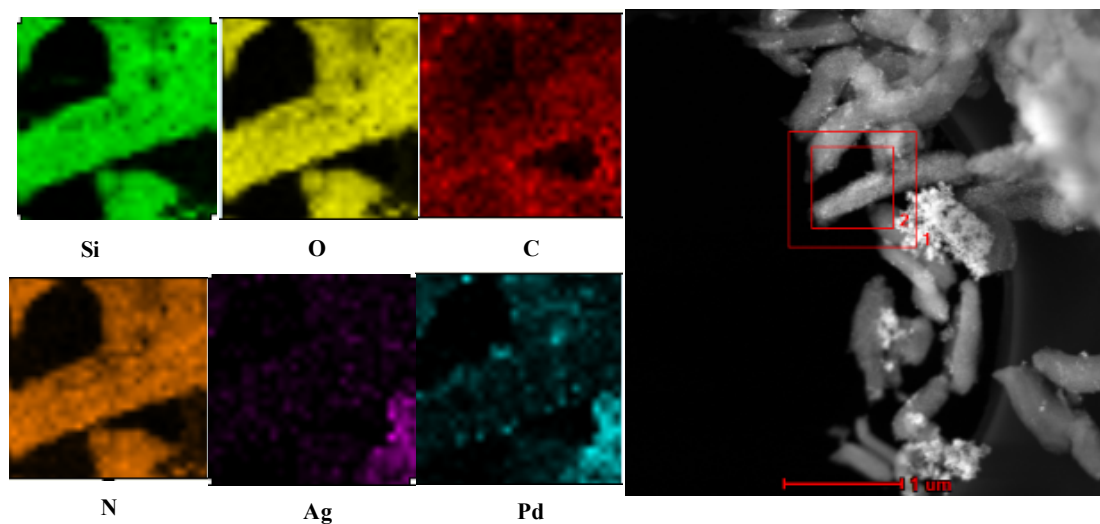

**Fig.S7.** The corresponding elemental mapping for Si, O, C, N, Ag and Pd elements and HAADF-STEM image of  $\text{Ag}_{10}\text{Pd}_{90}/0.2\text{CND}/\text{SBA-15}$ .

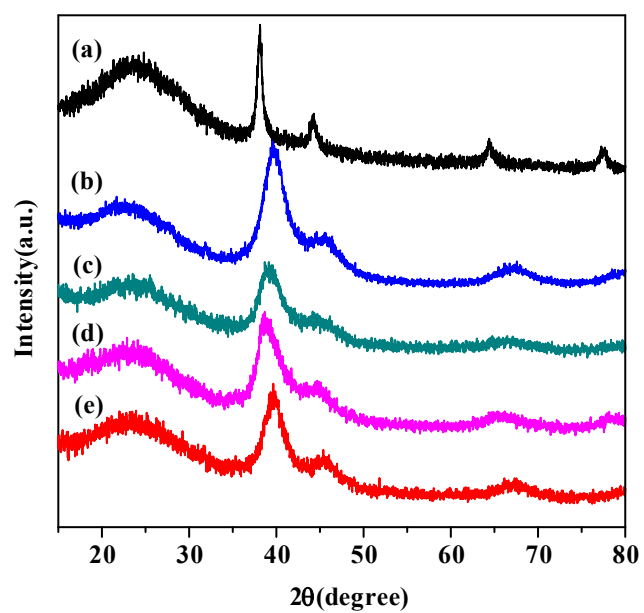

**Fig.S8.** Wide-angle XRD patterns for (a)  $\text{Ag}/0.2\text{CND}/\text{SBA-15}$ , (b)  $\text{Ag}_{10}\text{Pd}_{90}/0.2\text{CND}/\text{SBA-15}$ , (c)  $\text{Ag}_{20}\text{Pd}_{80}/0.2\text{CND}/\text{SBA-15}$ , (d)  $\text{Ag}_{30}\text{Pd}_{70}/0.2\text{CND}/\text{SBA-15}$  and (e)  $\text{Pd}/0.2\text{CND}/\text{SBA-15}$ .

**Table S1.** ICP-AES results and specific surface area of AgPd/mCND/SBA-15 catalysts

| Catalyst                                         | Ag (wt%) | Pd (wt%) | Ag-Pd initial composition | Ag-Pd final composition | Final Metals/Catalyst (mmol/100 mg) | S <sub>BET</sub> (m <sup>2</sup> g <sup>-1</sup> ) |
|--------------------------------------------------|----------|----------|---------------------------|-------------------------|-------------------------------------|----------------------------------------------------|
| Ag <sub>10</sub> Pd <sub>90</sub> /0.2CND/SBA-15 | 0.93     | 9.26     | 10:90                     | 9:91                    | 0.096                               | 548                                                |
| Ag <sub>20</sub> Pd <sub>80</sub> /0.2CND/SBA-15 | 1.95     | 8.16     | 20:80                     | 19:81                   | 0.095                               | 543                                                |
| Ag <sub>30</sub> Pd <sub>70</sub> /0.2CND/SBA-15 | 3.25     | 6.78     | 30:70                     | 32:68                   | 0.094                               | 541                                                |
| Ag <sub>10</sub> Pd <sub>90</sub> /SBA-15        | 1.09     | 8.68     | 10:90                     | 11:89                   | 0.092                               | 565                                                |
| Ag <sub>10</sub> Pd <sub>90</sub> /0.1CND/SBA-15 | 0.81     | 9.17     | 10:90                     | 8:92                    | 0.094                               | 555                                                |
| Ag <sub>10</sub> Pd <sub>90</sub> /0.3CND/SBA-15 | 1.21     | 8.68     | 10:90                     | 12:88                   | 0.093                               | 542                                                |
| Ag <sub>10</sub> Pd <sub>90</sub> /0.4CND/SBA-15 | 1.14     | 9.06     | 10:90                     | 11:89                   | 0.096                               | 535                                                |

**Table. S2** Comparison of AgPd/mCND/SBA-15 catalyzed decomposition of FA/SF solution (n<sub>FA</sub> = 3 mmol, n<sub>SF</sub> = 1 mmol)

| Catalyst                                         | T/ K | Conversion/ % | TOF <sub>initial</sub> / h <sup>-1</sup> | H <sub>2</sub> /CO <sub>2</sub> ratio |
|--------------------------------------------------|------|---------------|------------------------------------------|---------------------------------------|
| Ag <sub>10</sub> Pd <sub>90</sub> /0.2CND/SBA-15 | 323  | 100           | 893                                      | 1:1                                   |
| Ag <sub>20</sub> Pd <sub>80</sub> /0.2CND/SBA-15 | 323  | 96.0          | 609                                      | 1:1                                   |
| Ag <sub>30</sub> Pd <sub>70</sub> /0.2CND/SBA-15 | 323  | 92.0          | 478                                      | 1:1                                   |
| Ag <sub>10</sub> Pd <sub>90</sub> /SBA-15        | 323  | 92.0          | 304                                      | 1:1                                   |
| Ag <sub>10</sub> Pd <sub>90</sub> /0.1CND/SBA-15 | 323  | 96.0          | 638                                      | 1:1                                   |
| Ag <sub>10</sub> Pd <sub>90</sub> /0.3CND/SBA-15 | 323  | 96.0          | 558                                      | 1:1                                   |
| Ag <sub>10</sub> Pd <sub>90</sub> /0.4CND/SBA-15 | 323  | 92.0          | 343                                      | 1:1                                   |

TOF<sub>initial</sub> is calculated when x<sub>a</sub> reaches 20%.
